# Supplementary material for: Characteristics of vasculogenic mimicry and tumour to endothelial transdifferentiation in human glioblastoma: a systematic review
Source: BMC Cancer. 2023 Feb 23;23:185. doi: 10.1186/s12885-023-10659-y (PMC9948311; doi:10.1186/s12885-023-10659-y)
Supplement: Supplementary file 2 — Supplementary Material 2 [file 12885_2023_10659_MOESM2_ESM.xlsx]

## Sheet: supp_table_1
	Supplementary Table 1: Search strategy used for retrieval of records relating to vasculogenic mimicry and tumour to endothelial transdifferentiation in glioblastoma from Ovid MEDLINE
	#	Searches	Results
	1	vasculogenic mimicry.mp.	882
	2	vascular mimicry.mp.	121
	3	(tumo?r-derived vessel* or tumo?r-derived vascul* or tumo?r-derived endotheli*).mp.	178
	4	(glioma-derived vessel* or glioma-derived vascul* or glioma-derived endotheli*).mp.	6
	5	(glioblastoma-derived vessel* or glioblastoma-derived vascul* or glioblastoma-derived endotheli*).mp.	7
	6	1 or 2 or 3 or 4 or 5	1157
	7	(transdifferentiat* or trans-differentiat*).mp.	8004
	8	(dedifferentiat* or de-differentiat*).mp.	12821
	9	cell dedifferentiation/ or cell differentiation/ or cell transdifferentiation/	243181
	10	7 or 8 or 9	254337
	11	endothelial cells/ or endothelial progenitor cells/	52332
	12	endotheli*.mp.	423488
	13	11 or 12	423488
	14	10 and 13	12038
	15	6 or 14	13115
	16	glioma/ or glioblastoma/	66275
	17	glioblastoma.mp.	44675
	18	16 or 17	78819
	19	15 and 18	284
	20	limit 19 to yr="1999 -Current"	270

## Sheet: supp_table_2
	Supplementary Table 2: Search strategy used for retrieval of records relating to vasculogenic mimicry and tumour to endothelial transdifferentiation in glioblastoma from Ovid Embase
	#	Searches	Results
	1	vasculogenic mimicry.mp.	1120
	2	vascular mimicry.mp.	218
	3	(tumo?r-derived vessel* or tumo?r-derived vascul* or tumo?r-derived endotheli*).mp.	237
	4	(glioma-derived vessel* or glioma-derived vascul* or glioma-derived endotheli*).mp.	7
	5	(glioblastoma-derived vessel* or glioblastoma-derived vascul* or glioblastoma-derived endotheli*).mp.	11
	6	1 or 2 or 3 or 4 or 5	1526
	7	(transdifferentiat* or trans-differentiat*).mp.	11595
	8	(dedifferentiat* or de-differentiat*).mp.	18666
	9	cell transdifferentiation/	6060
	10	cell dedifferentiation/	5757
	11	7 or 8 or 9 or 10	29609
	12	endothelium cell/ or vascular endothelial cell/	173481
	13	endotheli*.mp.	589042
	14	12 or 13	589042
	15	11 and 14	2192
	16	6 or 15	3643
	17	glioblastoma cell line/ or glioblastoma.mp. or glioblastoma/ or glioblastoma multiforme cell line/	84687
	18	glioma/ or glioma.mp.	100616
	19	17 or 18	153193
	20	16 and 19	330
	21	limit 20 to yr="1999 -Current"	323

## Sheet: supp_table_3-4
	Supplementary Table 3: Techniques used to assess vasculogenic mimicry in human glioblastoma tissue				Supplementary Table 4: Markers used to assess vasculogenic mimicry in human glioblastoma tissue
	Technique	Frequency			Technique	Marker	Frequency
	IHC	35			IHC	PAS stain	34
	IF	6				CD34	28
	FISH	2				CD31	8
	PCR	2				GFAP	5
	Western blot	1				SMa	4
						HIF-1a	3
						Beclin-1	2
						COX-2	2
						MMP-9	2
						Twist1	2
						VE-cadherin	2
						VEGF	2
						VEGFR2	2
						Akt	1
						ALK	1
						ATG5	1
						c-myc	1
						CD163	1
						CD68	1
						collagen IV	1
						CXCR4	1
						EphA2	1
						goat polyclonal anti-hemoglobin-beta/gamma/epsilon/delta chain	1
						HDAC3	1
						Ki-67	1
						laminin	1
						MIF	1
						Mig-7	1
						MMP-2	1
						mTOR	1
						N-myc	1
						Nestin	1
						NG2	1
						ObR	1
						p-VEGFR2	1
						pAkt	1
						PDGFR	1
						pStat3	1
						SQSTM1	1
						Stat3	1
						TNC	1
						vimentin	1
					IF	CD31	3
						SMa	3
						VEGFR2	2
						CD133	1
						CD34	1
						CXCR4	1
						GFAP	1
						HIF-1a	1
						laminin	1
						MIF	1
						Nestin	1
						ObR	1
						PDGFRb	1
					FISH	EGFR amplification	2
					PCR	miR-Let-7f	1
						HOXA-AS2	1
					Western blot	Mig-7	1

## Sheet: supp_table_5-6
	Supplementary Table 5: Techniques used to assess vasculogenic mimicry ability of human glioblastoma cells in vitro				Supplementary Table 6: Markers used to assess vasculogenic mimicry ability of human glioblastoma cells in vitro
	Technique	Frequency			Technique	Marker	Frequency
	TFA	49			TFA	Morphology	48
	Western blot	34				PAS stain	4
	PCR	22				Morphology (fluorescence microscopy)	2
	IF	8				beta tubulin III	1
	ELISA	6				VEGFR2	1
	3D collagen scaffold	1				Gal C	1
	3D organotypic coculture	1				GFAP	1
	Differentiation assay	1				SMa	1
	Flow cytometry	1			Western blot	MMP-2	15
	Gelatin zymography	1				VE-cadherin	13
	Invasion assay	1				MMP-9	11
	Migration assay	1				Akt	7
	Scanning electron microscopy	1				EphA2	7
	Sprouting assay	1				p-Akt	7
	Wound healing assay	1				VEGFR2	6
						MMP-14	5
						SMa	5
						VEGF	5
						E-cadherin	4
						HIF-1a	4
						LAMC2	4
						N-cadherin	4
						PI3K	4
						Tie2	3
						Bcl-2	2
						CD133	2
						CD31	2
						EGFR	2
						GFAP	2
						LAMB2	2
						mTOR	2
						p-PI3K	2
						p-VEGFR2	2
						Tie1	2
						Twist1	2
						vimentin	2
						AEG-1	1
						Ang2	1
						AQP1	1
						ATG5	1
						ATG7	1
						Bax	1
						Beclin-1	1
						bFGF	1
						caveolin-1	1
						COX-2	1
						CXCR4	1
						DSG2	1
						EGF	1
						ERK1/2	1
						FAK	1
						FOXK1	1
						HDAC3	1
						JNK	1
						LC3-I	1
						LC3-II	1
						LC3B	1
						MAPK	1
						MIF	1
						MMP-1	1
						nestin	1
						neuronal class III beta-tubulin-1	1
						p-ERK1/2	1
						p-FAK (Tyr 397)	1
						p-FAK (Tyr 576)	1
						p-JNK	1
						p-mTOR	1
						p-PKC	1
						P62	1
						PABPC5	1
						PDGF BB	1
						PUM2	1
						ROBO1	1
						Slug	1
						Snail	1
						SQSTM1	1
						SUMO1	1
						SUMO2/3	1
						TNC	1
						tubulin	1
						UBE2I	1
						ZNF331	1
						ZO-1	1
						ZRANB2	1
					PCR	MMP-2	9
						EphA2	7
						MMP-9	6
						LAMC2	4
						MMP-14	4
						VE-cadherin	4
						VEGF	3
						HIF-1a	2
						TGF beta	2
						VEGFR2	2
						AEG-1	1
						AQP1	1
						Bcl-2	1
						Beclin-1	1
						CD133	1
						CD31	1
						CD34	1
						CEBPD	1
						Desmin	1
						DSG2	1
						E-cadherin	1
						endoglin	1
						EphB2	1
						FAK	1
						FOXK1	1
						GFAP	1
						HCG15	1
						HDAC3	1
						HOXA-AS2	1
						lncRNA HULC	1
						miR-141	1
						miR-29a-3p	1
						miR-29b	1
						N-cadherin	1
						neuropilin-2	1
						Notch1	1
						PABPC5	1
						PI3K	1
						PUM2	1
						Slug	1
						SMa	1
						Snail	1
						SNHG20	1
						TFPI-1	1
						Tie1	1
						Tie2	1
						UBE2I	1
						VEGFR1	1
						Vimentin	1
						YAP	1
						ZNF331	1
					IF	beta tubulin III	2
						CD133	1
						CD31	1
						CD34	1
						CXCR4	1
						E-cadherin	1
						Gal C	1
						GFAP	3
						HIF-1a	1
						LAMB3	1
						LC3	1
						LC3B	1
						MAP-2	1
						MIF	1
						nestin	2
						neuronal class III beta-tubulin-1	1
						Oct4	1
						SMa	5
						Sox2	2
						VE-cadherin	4
						VEGFR2	2
					ELISA	VEGF	3
						TGF beta	2
						MMP-2	2
						VE-cadherin	2
						HIF-1a	1
						MMP-9	1
						FAK	1
						PI3K	1

## Sheet: supp_table_7-8
	Supplementary Table 7: Techniques used to assess vasculogenic mimicry ability of human glioblastoma cells in vivo				Supplementary Table 8: Markers used to assess vasculogenic mimicry ability of human glioblastoma cells in vivo
	Technique	Frequency			Technique	Marker	Frequency
	IHC	32			IHC	PAS stain	30
	IF	5				CD34	17
	Matrigel plug assay	1				CD31	6
						human CD31	4
						GFAP	3
						mouse CD31	3
						human CD34	2
						SMa	2
						TNC	2
						bFGF	1
						COX-2	1
						EGF	1
						H&E	1
						HIF-1a	1
						human SMa	1
						laminin	1
						methyl green (counterstain)	1
						MHC-1	1
						MMP-2	1
						MMP-9	1
						mouse CD34	1
						pAkt	1
						PDGFBB	1
						PDGFR	1
						PDGFR beta	1
						stathmin	1
						VEGFA	1
						VEGFR2	1
					IF	CD31	4
						human CD31	3
						GFAP	2
						SMa	2
						CD34	1
						EphA2	1
						human CD34	1
						laminin	1
						PDGFR	1
						PDGFR beta	1
						VE-cadherin	1
						VEGFR2	1

## Sheet: supp_table_9-10
	Supplementary Table 9: Techniques used to assess tumour to endothelial cell transdifferentiation in human glioblastoma tissue				Supplementary Table 10: Markers used to assess tumour to endothelial cell transdifferentiation in human glioblastoma tissue
	Technique	Frequency			Technique	Marker	Frequency
	IF	5			IF	CD31	3
	IHC	4				CD34	2
	FISH	2				Nestin	2
	PCR	2				vWF	2
	FACS	1				ABCG2	1
	Flow cytometry	1				CD105	1
	Western blot	1				CD133	1
						EGFR	1
						ETV2	1
						VEGF	1
						VEGFR2	1
					IHC	Nestin	2
						CD133	1
						ETV2	1
						Tie2	1
						VE-cadherin	1
					FISH	EGFR amplification	2
						Chromosome 7	1
					PCR	ETV2	1
						HIF-1a	1
						HIF-2a	1
						VE-cadherin	1
					FACS	CD105	1
						CD133	1
						CD31	1
						CD34	1
						VE-cadherin	1
						VEGFR2	1
						vWF	1
					Flow cytometry	CD31	1
						ETV2	1
					Western blot	ETV2	1

## Sheet: supp_table_11-12
	Supplementary Table 11: Techniques used to assess tumour to endothelial cell transdifferentiation of human glioblastoma cells in vitro				Supplementary Table 12: Markers used to assess tumour to endothelial cell transdifferentiation of human glioblastoma cells in vitro
	Technique	Frequency			Technique	Marker	Frequency
	PCR	9			PCR	CD31	6
	TFA	9				VE-cadherin	4
	IF	7				CD34	3
	Western blot	7				VEGFR2	3
	Flow cytometry	4				vWF	3
	ELISA	3				Endoglin	2
	FACS	2				Tie2	2
	LDL uptake assay	2				ADAMTS1	1
	3D bioprinted microenvironment	1				ANG1	1
	HPLC	1				ANG2	1
	Microarray	1				beta1,4GalTV	1
	Migration assay	1				Calponin	1
						Dll1	1
						EGFR	1
						ETV2	1
						HIF-1a	1
						HIF-2a	1
						NG2	1
						Notch1	1
						Olig2	1
						PDGFRbeta	1
						SMa	1
						Sox2	1
						Tuj1	1
						VEGF	1
					TFA	Morphology (light microscopy)	8
						CD31	2
						CD105	1
						CD34	1
						EB1	1
						ERG	1
						Morphology (fluorescence microscopy)	1
						GFAP	1
						VEGFR2	1
					IF	CD31	6
						CD34	4
						GFAP	4
						Nestin	4
						CD133	3
						VEGFR2	3
						VE-cadherin	2
						vWF	2
						CD105	1
						Dll1	1
						NeuN	1
						Notch	1
						Tie2	1
						VEGF	1
						Vimentin	1
					Western blot	CD31	3
						HIF-1a	2
						Notch1	2
						A3AR	1
						ADAMTS1	1
						Akt	1
						beta1,4GalTV	1
						CD34	1
						Dll1	1
						EB1	1
						ERG	1
						ERK	1
						FLAG	1
						galectin-3	1
						GFAP	1
						HIF-2a	1
						Olig2	1
						pAkt	1
						pERK	1
						pTie2	1
						Sox2	1
						Tie2	1
						Tuj1	1
						VE-cadherin	1
						vWF	1
					Flow cytometry	CD31	3
						VE-cadherin	3
						CD34	2
						GFAP	1
						vWF	1
					ELISA	VEGF	3
					FACS	CD31	2
						CD105	1
						CD133	1
						CD34	1
						VE-cadherin	1
						VEGFR2	1
						vWF	1
					HPLC	Adenosine production (adenosine, AMP, ADP, ATP)	1

## Sheet: supp_table_13-14
	Supplementary Table 13: Techniques used to assess tumour to endothelial cell transdifferentiation of human glioblastoma cells in vivo				Supplementary Table 14: Markers used to assess tumour to endothelial cell transdifferentiation of human glioblastoma cells in vivo
	Technique	Frequency			Technique	Marker	Frequency
	IF	6			IF	human CD31	4
	IHC	6				mouse CD31	3
	FACS	2				CD31 (non-specific)	1
	Matrigel plug assay	1				human CD105	1
	RNA-seq	1				human GFAP	1
						human Nestin	1
						human vWF	1
						ki67	1
						vWF	1
					IHC	human CD105	2
						human CD31	2
						CD31 (non-specific)	1
						H&E	1
						HLA	1
						mouse CD105	1
						mouse CD31	1
						PAS stain	1
					FACS	human CD31	2
						mouse CD31	1
						human CD105	1
						human CD133	1
						HLA	1
						human PDPN	1
						mouse PDPN	1
						human VE-cadherin	1
						human VEGFR3	1
						mouse VEGFR3	1
